# Supplementary material for: A transgenic approach for controlling Lygus in cotton
Source: PubMed Central journal article supplement (PMC4960306; doi:10.1038/ncomms12213), 2016-07-18
Supplement: ncomms12213-s1.pdf [file ncomms12213-s1.pdf]

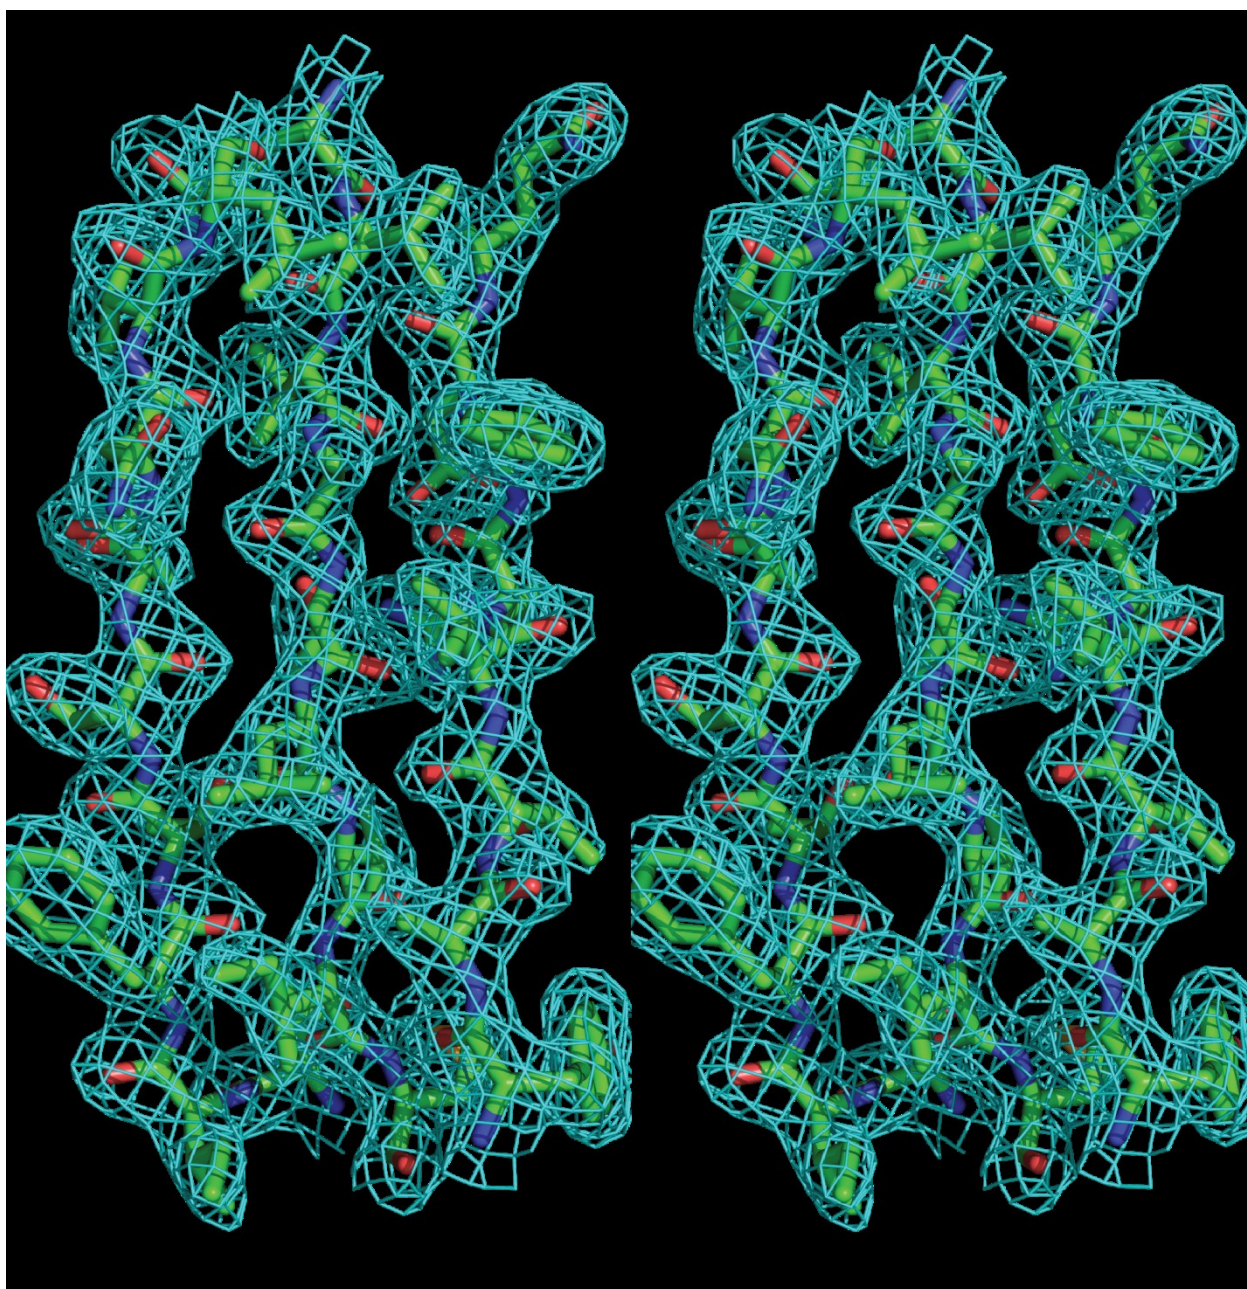

**Supplementary Fig. 1.** Stereo image of  $\beta$ -sheet structure and density map in Cry51Aa2: Residues displayed from left to right are 65-72, 169-177, and 259-266. The map is a 2Fo-Fc map contoured at  $1\sigma$  level

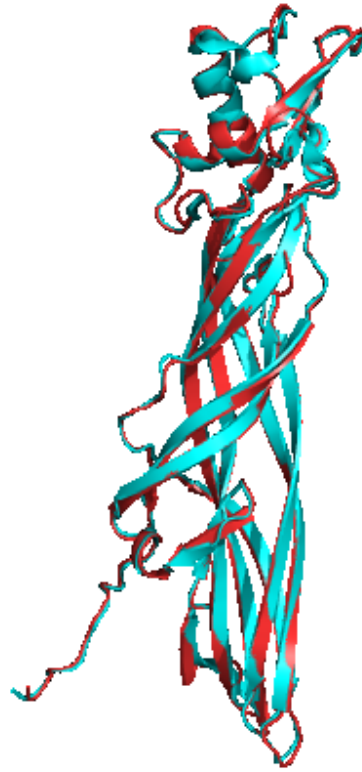

**Supplementary Fig. 2.** Cry51Aa1 (ref. 13) and Cry51Aa2 display a high level of structural similarity. Cry51Aa1 (1.65 Å resolution; cyan); Cry51Aa2 (2.28 Å resolution; red); r.m.s.d.=0.57 Å for 291 alpha carbon pairs.

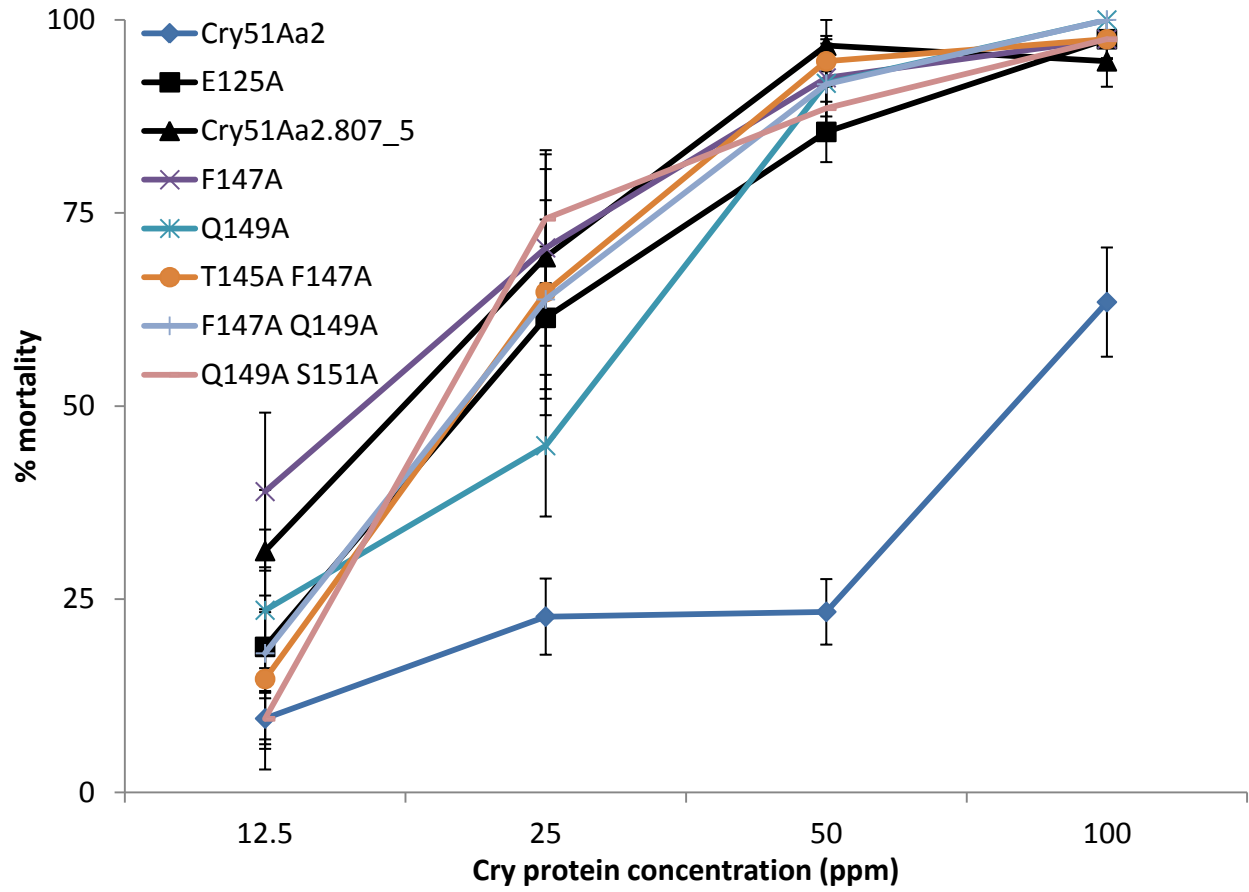

**Supplementary Fig. 3.** Concentration-response assay demonstrating improved activity of select Cry51Aa2 variants towards *L. hesperus*. Data shown as mean  $\pm$  s.e.m. ( $n=24$ )

|          |             |                    |                   |                  |                   |            |     |
|----------|-------------|--------------------|-------------------|------------------|-------------------|------------|-----|
| TIC853   | MAILDLKSLV  | LDAINYWGPK         | NNNGIQGYNF        | NYPISERQID       | TSIITSTHSR        | LMPHDLTIPQ | 60  |
| Cry51Aa1 | LAILDLKSLV  | LNAINYWGPK         | NNNGIQGGDF        | GYPISEKQID       | TSIITSTHPR        | LIPHDLTIPQ | 63  |
| Cry51Aa2 | MAILDLKSLV  | LNAINYWGPK         | NNNGIQGGDF        | GYPISEKQID       | TSIITFTHPR        | LIPYDLTIPQ | 60  |
|          | *           | *                  | **                | *                | *                 | * *        | 60  |
|          |             |                    |                   |                  |                   |            |     |
| TIC853   | NLETIFTTQ   | VLTNNTDVQQ         | SQTVSFSKKT        | TTTTSTSTTD       | GWTEGGRISD        | TLEENVSVSI | 120 |
| Cry51Aa1 | NLETIFTTQ   | VLTNNTDLQQ         | SQTVSFAKKT        | TTTTSTSTTN       | GWTEGGKISD        | TLEEKVSVSI | 123 |
| Cry51Aa2 | NLETIFTTQ   | VLTNNTDLQQ         | SQTVSFAKKT        | TTTTSTSTTN       | GWTEGGKISD        | TLEEKVSVSI | 120 |
|          |             | *                  | *                 | *                | *                 | *          | 120 |
|          |             |                    |                   |                  |                   |            |     |
| TIC853   | PFIGAGGAKN  | STTIEANVAH         | NSSTTTSQQA        | STEIEWNISQ       | PVLVPPRKQV        | VATLVIMGGD | 180 |
| Cry51Aa1 | PFIGEGGGKKN | STTIEANFAH         | NSSTTTFQQA        | STDIEWNISQ       | PVLVPPRKQV        | VATLVIMGGN | 183 |
| Cry51Aa2 | PFIGEGGGKKN | STTIEANFAH         | NSSTTTFQQA        | STDIEWNISQ       | PVLVPPSKQV        | VATLVIMGGN | 180 |
|          | * *         | *                  | *                 | *                | *                 | *          | 180 |
|          |             |                    |                   |                  |                   |            |     |
| TIC853   | FTVPMDLITT  | IDSTQ---HF         | TGYPILTWIE        | <b>NPEHNVGRF</b> | <b>LSWFFANWPN</b> | LPSEFGSLNS | 237 |
| Cry51Aa1 | FTIPMDLMTT  | IDSTE---HY         | SGYPILTWIS        | SPDNSYNGPF       | MSWYFANWPN        | LPSGFGPLNS | 240 |
| Cry51Aa2 | FTIPMDLMTT  | IDSTE <b>HYSHY</b> | <b>SGYPILTWIS</b> | SPDNSYSGPF       | MSWYFANWPN        | LPSGFGPLNS | 240 |
|          | * *         | **** *             | *                 | *                | * * * * *         | * *        |     |
|          |             |                    |                   |                  |                   |            |     |
| TIC853   | DNTITYKGSV  | VSRISAGVYA         | TVRFDQYAIN        | NLRTIEKTWY       | ARHGLHNGK         | KISINNVTEM | 297 |
| Cry51Aa1 | DNTVITYTGSV | VSQVSAGVYA         | TVRFDQYDIH        | NLRTIEKTWY       | ARHATLHNGK        | KISINNVTEM | 300 |
| Cry51Aa2 | DNTVITYTGSV | VSQVSAGVYA         | TVRFDQYDIH        | NLRTIEKTWY       | ARHATLHNGK        | KISINNVTEM | 300 |
|          | * *         | **                 | * *               | *                | *                 | *          |     |
|          |             |                    |                   |                  |                   |            |     |
| TIC853   | APTSPPIERN  | 306                |                   |                  |                   |            |     |
| Cry51Aa1 | APTSPIKTN   | 309                |                   |                  |                   |            |     |
| Cry51Aa2 | APTSPIKTN   | 309                |                   |                  |                   |            |     |
|          | **          | 309                |                   |                  |                   |            |     |

**Supplementary Fig. 4.** Alignment of the Cry51Aa1, Cry51Aa2, and TIC853 (ref. 14) amino acid sequences. Amino acid differences are denoted by the asterisk.

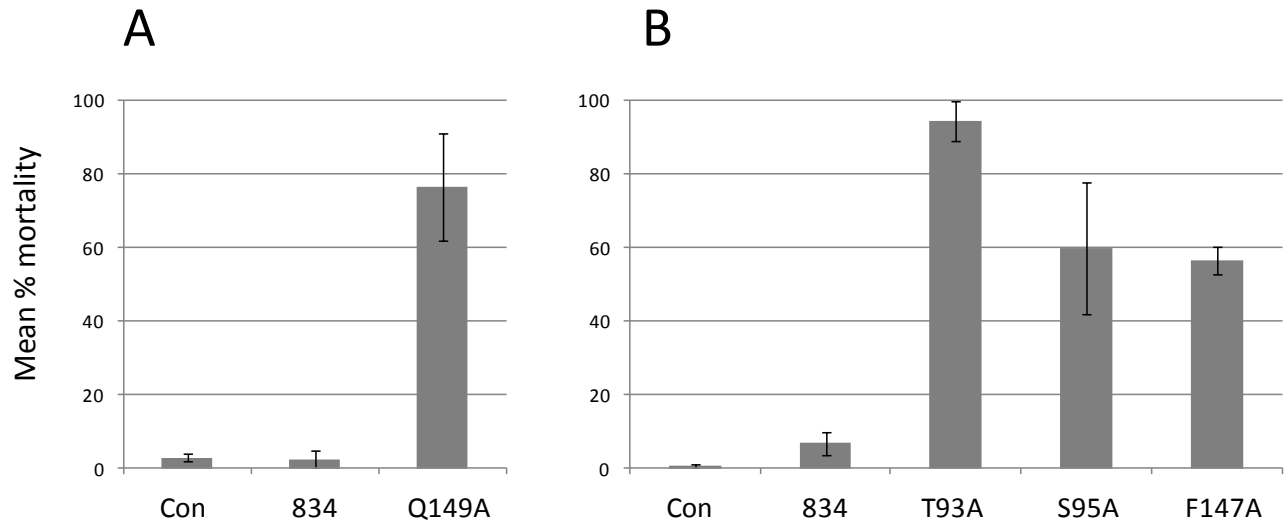

**Supplementary Fig. 5.** Bioassays demonstrating improved activity of select Cry51Aa2.834 alanine substitution variants towards *L. hesperus*. Proteins were presented in the diet at a concentration of 3.1 ppm. Con = buffer negative control; 834 = parental Cry51Aa2.834 protein. Data shown as mean  $\pm$  s.e.m. ( $n=24$ ). Panels A and B summarize data from two independent tests.

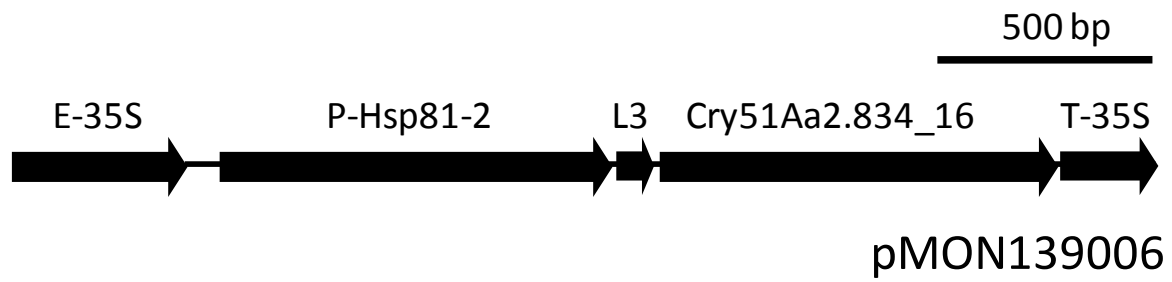

**Supplementary Fig. 6.** Schematic diagram of the Cry51Aa2.834\_16 expression cassette contained on the plant transformation vector pMON139006. E- enhancer, P-Promoter, L- leader and T-terminator.

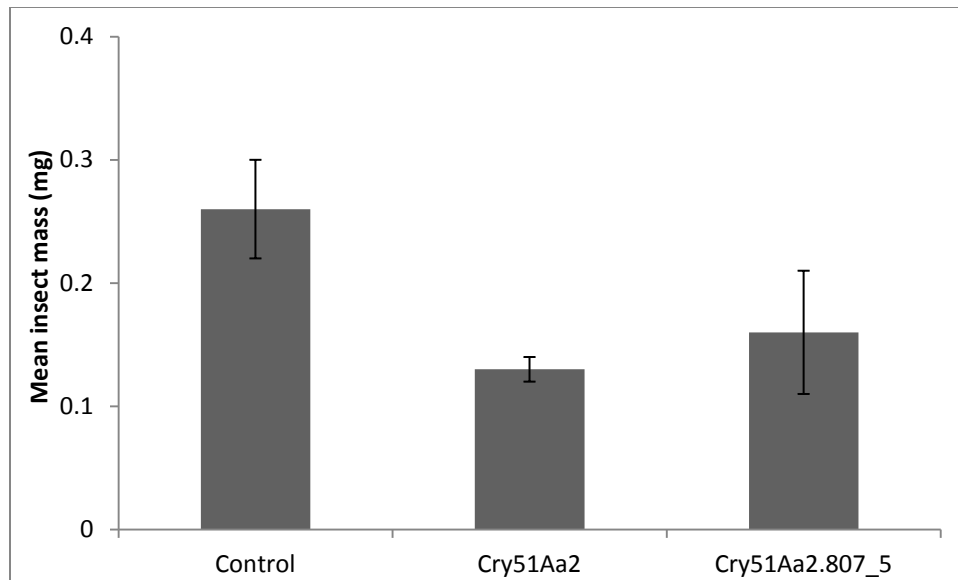

**Supplementary Fig. 7.** Bioassay demonstrating that the HYS deletion in Cry51Aa2.807\_5 protein does not impact activity towards *Lygus lineolaris*. Proteins were presented in the diet at a concentration of 100 ppm and the assay scored for mean insect mass. Control = buffer negative control; Data shown as mean  $\pm$  s.e.m. ( $n=40$ ).

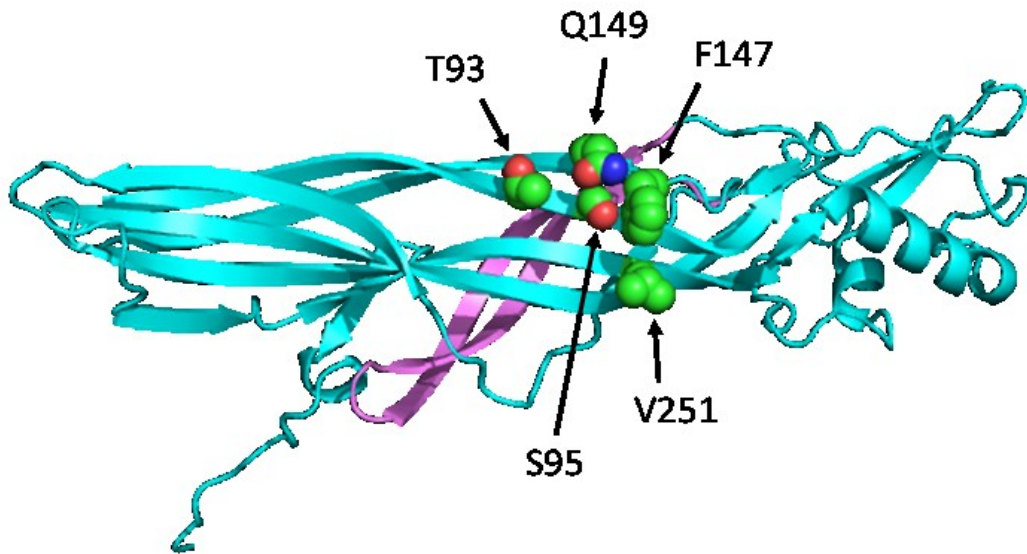

**Supplementary Fig. 8.** Alanine substitution sites in the wild-type Cry51Aa2 resulting in increased activity towards *Lygus hesperus* are located on three adjacent  $\beta$  strands in close proximity to each other. The putative beta-pore-forming loop is colored magenta.



**Supplementary Table 1.** Data collection, phasing and refinement statistics for SeMet-Cry51Aa1-L11M: MAD data collection for structure solution and high resolution data for refinement

|                                        | Native | Crystal 1   |                   |               | Crystal 2   |
|----------------------------------------|--------|-------------|-------------------|---------------|-------------|
| <b>Data collection</b>                 |        |             |                   |               |             |
| Space group                            |        | P43212      |                   |               | P43212      |
| Cell dimensions                        |        |             |                   |               |             |
| <i>a</i> , <i>b</i> , <i>c</i> (Å)     |        | 54.8, 54.8, |                   |               | 55.6, 55.6, |
|                                        |        | 208.9       |                   |               | 209.0       |
| $\alpha$ , $\beta$ , $\gamma$ (°)      |        | 90°, 90°,   |                   |               | 90°, 90°,   |
|                                        |        | 90°         |                   |               | 90°         |
|                                        |        | <i>Peak</i> | <i>Inflection</i> | <i>Remote</i> |             |
| Wavelength                             |        | 0.97972     | 0.97996           | 0.97228       | 1.00        |
| Resolution (Å)                         |        | 50-2.75     | 20-2.80           | 20-2.8        | 53.7-2.28   |
| $R_{\text{sym}}$ or $R_{\text{merge}}$ |        | 0.109       | 0.110             | 0.105         | 0.08        |
| $I / \sigma I$                         |        | 34.0        | 32.3              | 37.3          | 17.4        |
| Completeness (%)                       |        | 99.9%       | 100%              | 99.9%         | 95.9%       |
| Redundancy                             |        | 22.6        | 22.6              | 22.6          | 4.7         |
| <b>Refinement</b>                      |        |             |                   |               |             |
| Resolution (Å)                         |        | 53.7-2.75   |                   |               | 53.7-2.28   |
| No. reflections                        |        | 9165        |                   |               | 15297       |
| $R_{\text{work}} / R_{\text{free}}$    |        | 0.218/0.304 |                   |               | 0.238/0.295 |
| No. atoms                              |        | 2456        |                   |               | 2437        |
| Protein                                |        | 2390        |                   |               | 2390        |
| Ligand/ion                             |        | -           |                   |               | -           |
| Water                                  |        | 66          |                   |               | 47          |
| <i>B</i> -factors                      |        |             |                   |               |             |
| Protein                                |        | 42.1        |                   |               | 41.4        |
| Ligand/ion                             |        | -           |                   |               | -           |
| Water                                  |        | 31.7        |                   |               | 41.3        |
| R.m.s deviations                       |        |             |                   |               |             |
| Bond lengths (Å)                       |        | 0.014 Å     |                   |               | 0.019 Å     |
| Bond angles (°)                        |        | 1.60°       |                   |               | 1.80°       |

**Supplementary Table 2.** Cry51Aa2 alanine scan variants showing increased mortality compared to the wild-type Cry51Aa2 protein towards *Lygus hesperus* in artificial diet feeding assays

| Amino acid substitution | Strategy        | Test concentration (ppm) |
|-------------------------|-----------------|--------------------------|
| S95A, F147A             | Combinatorial   | 12.5                     |
| E125A                   | Alanine scan    | 25                       |
| E125A, F147A            | Combinatorial   | 12.5                     |
| E125A, Q149A            | Combinatorial   | 12.5                     |
| G128A                   | Alanine scan    | 25                       |
| I134A                   | Alanine scan    | 25                       |
| E135S                   | Alanine scan    | 25                       |
| T145A                   | Alanine scan    | 25                       |
| T145A, F147A            | Double Ala scan | 25                       |
| F147A                   | Alanine scan    | 25                       |
| F147A, Q149A            | Double Ala scan | 25                       |
| F147A, S159A            | Combinatorial   | 12.5                     |
| F147A, L187A            | Combinatorial   | 12.5                     |
| Q149A                   | Alanine scan    | 25                       |
| Q149A, S151A            | Double Ala scan | 25                       |
| Q149A, T182A            | Combinatorial   | 12.5                     |
| D153A                   | Alanine scan    | 25                       |
| S159A                   | Alanine scan    | 25                       |
| V175A                   | Alanine scan    | 25                       |
| T182A                   | Alanine scan    | 25                       |
| L187A                   | Alanine scan    | 25                       |
| I123A, A139S            | Combinatorial   | 25                       |
